# Supplementary material for: All-redox hybrid supercapacitors based on carbon modified stacked zinc cobaltite nanosheets
Source: Royal Society of Chemistry journal article supplement (doi:10.1039/d3se00680h), 2023-01-01
Supplement: d3se00680h1.pdf [file d3se00680h1.pdf]

# All-Redox Hybrid Supercapacitors Based on Carbon Modified Stacked Zinc Cobaltite Nanosheets

Simran Kour, Pawanpreet Kour, A. L. Sharma\*

Department of Physics, Central University of Punjab, Bathinda, Punjab, India-151401

\*Corresponding author: [alsharma@cup.edu.in](mailto:alsharma@cup.edu.in)

## Supporting Information

### 1. Electrode preparation and assembly

For the preparation of the electrodes, the active material was blended with PVDF and carbon black in a ratio of 8:1:1. PVDF acted as a binder and carbon black worked as a conductive element. The three materials were blended properly in a mortar pestle with the help of N-Methyl-2-pyrrolidone (NMP) to get uniform slurry. The slurry was then coated onto the Nickel foam cut in circular form with area of 1 cm<sup>2</sup>. The electrode was then kept for drying overnight at 60 °C in a vacuum oven. The separator (Whatman paper) wetted by 6M KOH electrolyte was sandwiched between the two electrodes and pressed using a hydraulic press to get the desired cell configuration. For symmetric configuration, two similar electrodes were taken. For asymmetric configuration, two different electrodes of different materials were chosen.

### 2. Electrochemical measurements

All the electrochemical measurements have been performed in 2-electrode configuration. The electrochemical investigations (CV and GCD) of the pure ZnCo<sub>2</sub>O<sub>4</sub> and the composite ZnCo<sub>2</sub>O<sub>4</sub>/AC have been performed in symmetric configuration with a voltage range of 0-1V. For asymmetric configuration, the voltage window was optimized to be 0-1.6V. The EIS analysis was carried out for 10<sup>5</sup>-0.1 Hz of frequency at open-circuit voltage. The Formulae used for determining various parameters such as specific capacitance, energy density, and power density has been provided in **Table S2**.

**Table S1:** Formulae used for finding various structural parameters.

| Parameter           | Formula                                                                    | Terms used                                                                                  |
|---------------------|----------------------------------------------------------------------------|---------------------------------------------------------------------------------------------|
| Bragg's law         | $2d\sin\theta = \lambda$                                                   | 'd' is inter-planar spacing, 'θ' is bragg's diffraction angle, λ is the wavelength of X-ray |
| Interplanar spacing | $d = \frac{1}{\sqrt{\frac{h^2}{a^2} + \frac{k^2}{b^2} + \frac{l^2}{c^2}}}$ | (hkl) are miller indices of lattice plane, (a, b, c) are lattice parameters of the crystal  |

|                                              |                                                         |                                                                                                                                         |
|----------------------------------------------|---------------------------------------------------------|-----------------------------------------------------------------------------------------------------------------------------------------|
| Crystallite size, $D$<br>(Scherrer equation) | $D = \frac{K \cdot \lambda}{\omega \times \cos \theta}$ | $K(\sim 0.94)$ is a constant, $\lambda$ is the wavelength of X-ray, ' $\omega$ ' is the FWHM, ' $\theta$ ' is bragg's diffraction angle |
| Cell volume, $V$                             | $V = abc \sin \beta$                                    | $a, b, \text{ and } c$ are lattice parameters of the crystal structure. ' $\beta$ ' is the lattice angle                                |
| Micro strain, $\varepsilon$                  | $\varepsilon = \frac{\omega \times \cos \theta}{4}$     | ' $\omega$ ' is the FWHM, ' $\theta$ ' is bragg's diffraction angle                                                                     |
| Dislocation density, $\delta$                | $\delta = \frac{1}{D^2}$                                | ' $D$ ' is the crystallite size                                                                                                         |

**Table S2:** Formulae used for electrochemical investigation.

| Parameter                                    | Formula                                          | Terms used                                                                                                                        |
|----------------------------------------------|--------------------------------------------------|-----------------------------------------------------------------------------------------------------------------------------------|
| Specific capacitance, $C_{sp}$<br>(from CV)  | $C_{sp} = \frac{\int IdV}{m \times v \times dV}$ | ' $I$ ' is the current, ' $dV$ ' is the potential window, ' $m$ ' is the mass of total active material, ' $v$ ' is the scan rate. |
| Specific capacitance, $C_{sp}$<br>(from GCD) | $C_{sp} = \frac{I \times \Delta t}{m \times dV}$ | ' $I$ ' is the current, ' $dt$ ' is the discharging time, ' $m$ ' is the mass of total active material.                           |
| Energy density, $E_d$<br>(from GCD)          | $E_d = \frac{C_{sp} \times (dV)^2}{7.2}$         | ' $C_{sp}$ ' is the specific capacitance, ' $dV$ ' is the voltage window.                                                         |
| Power density, $P_d$<br>(from GCD)           | $P_d = \frac{E_d \times 3600}{\Delta t}$         | ' $E_d$ ' is the energy density, ' $\Delta t$ ' is the discharging time.                                                          |
| Coulombic efficiency, $\eta$                 | $\eta = \frac{t_d \times 100}{t_c}$              | ' $t_d$ ' is the discharging time and ' $t_c$ ' is the charging time.                                                             |
| Response time, $\tau$<br>(from EIS)          | $\tau = \frac{1}{\nu}$                           | ' $\nu$ ' is the frequency corresponding to phase angle $\theta = 45^\circ$ .                                                     |

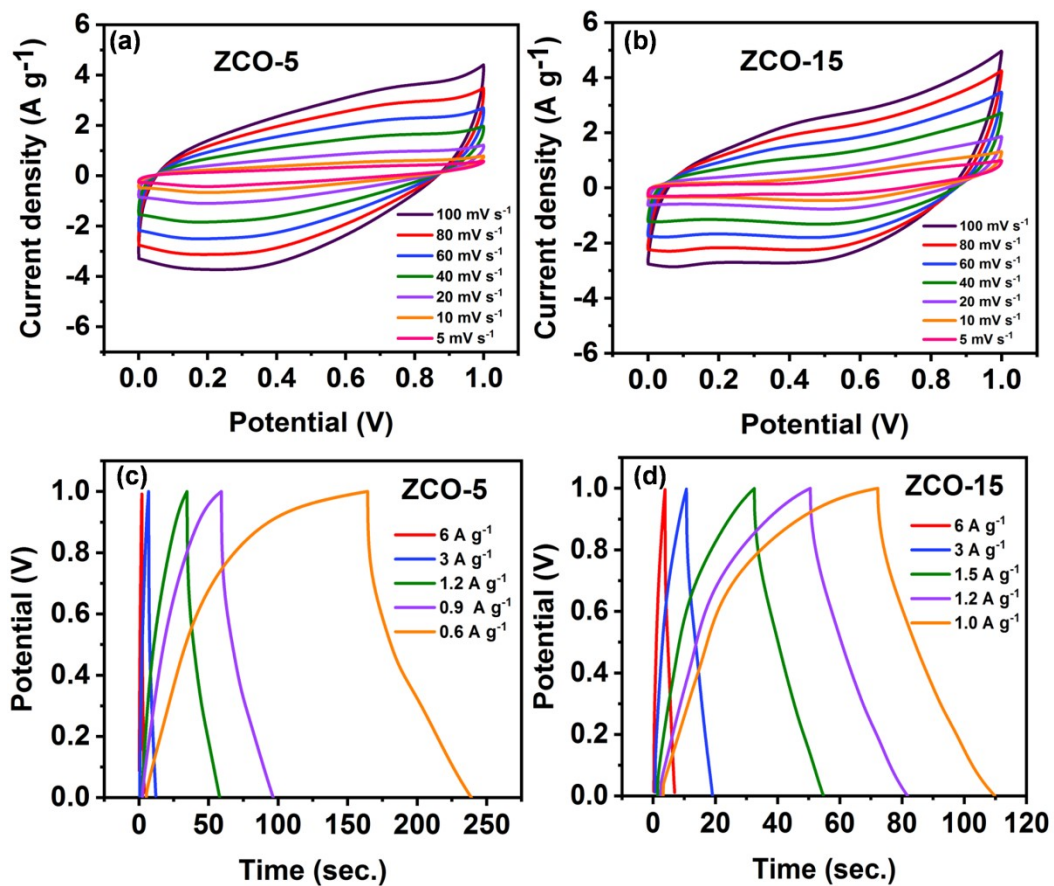

**Fig. S1:** (a, b) CV of ZCO-5 and ZCO-15 at various scan rates; (c, d) GCD of ZCO-5 and ZCO-15 at various currents.

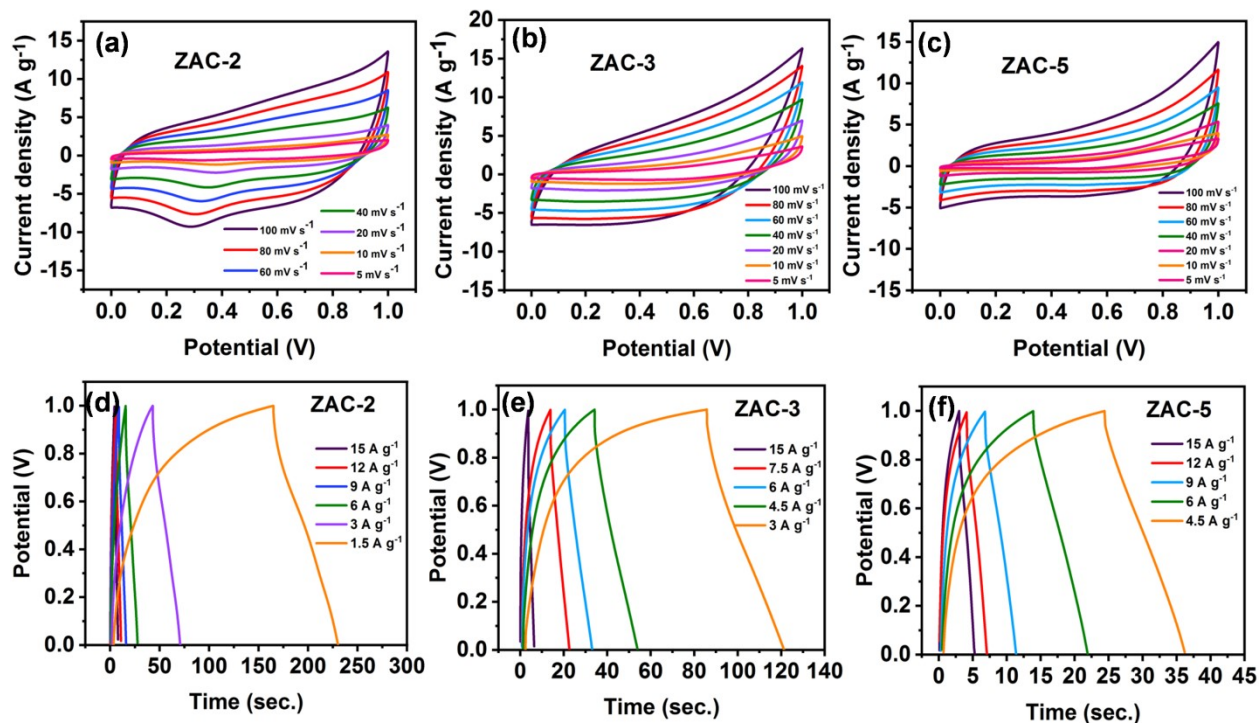

**Fig. S2:** (a-c) CV of ZAC-2, ZAC-3, and ZAC-5 at various scan rates; (d-f) GCD of ZAC-2, ZAC-3, and ZAC-5 at various currents.

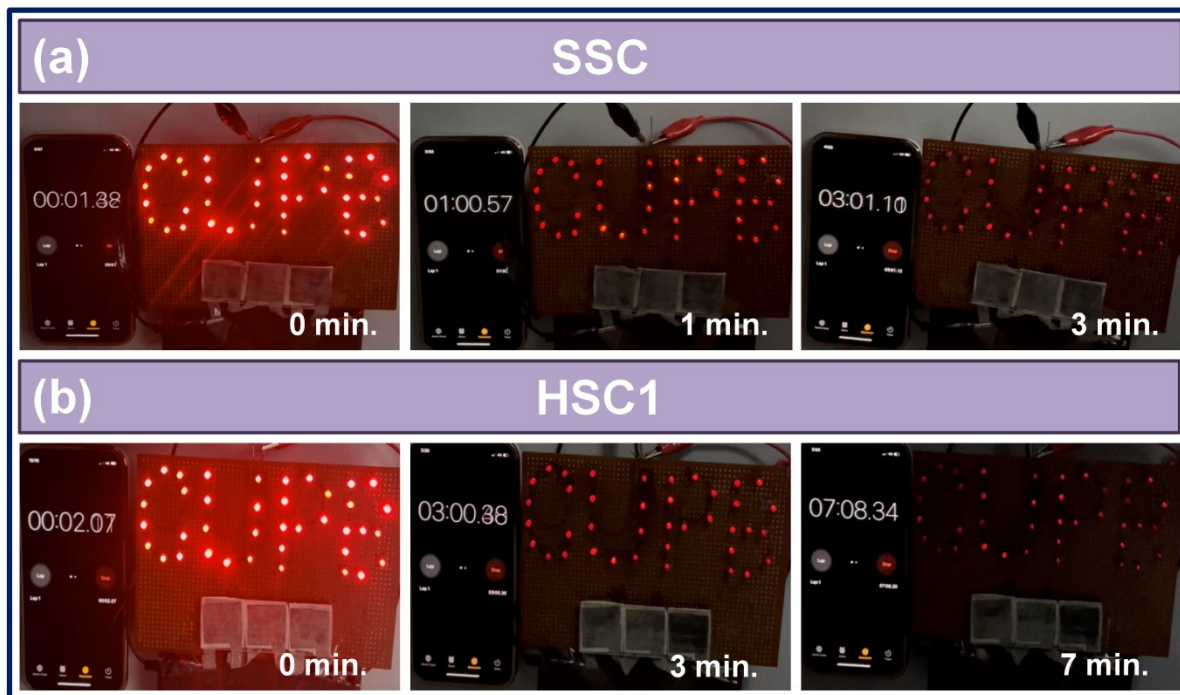

**Fig S3:** Photographs of illuminated LED panel for (a) SSC and (b) HSC1 at different times.

### 3. Three-electrode measurements of ZNCO-10

For 3-electrode analysis, the prepared ZNCO-10 electrode was taken as working electrode, Ag/AgCl as a reference electrode, and platinum electrode was used as the counter electrode. The cyclic voltammetry (CV) and constant current charge/discharge (GCD) analysis was performed to investigate the nature of the electrode material. The CV curves were measured at various scan rates (10–100  $\text{mV s}^{-1}$ ), and the GCD performance was tested in the potential window density from 0 to 0.4 V at different currents ranging from 2 to 12  $\text{A g}^{-1}$ . All these measurements were conducted at room temperature. **Fig. S4(a)** represents the CV curves of the optimized ZNCO-10 with obvious redox peaks showing pseudocapacitive behavior of the electrode material. **Fig. S4(b)** represents the GCD curves for the sample with obvious charge plateaus.

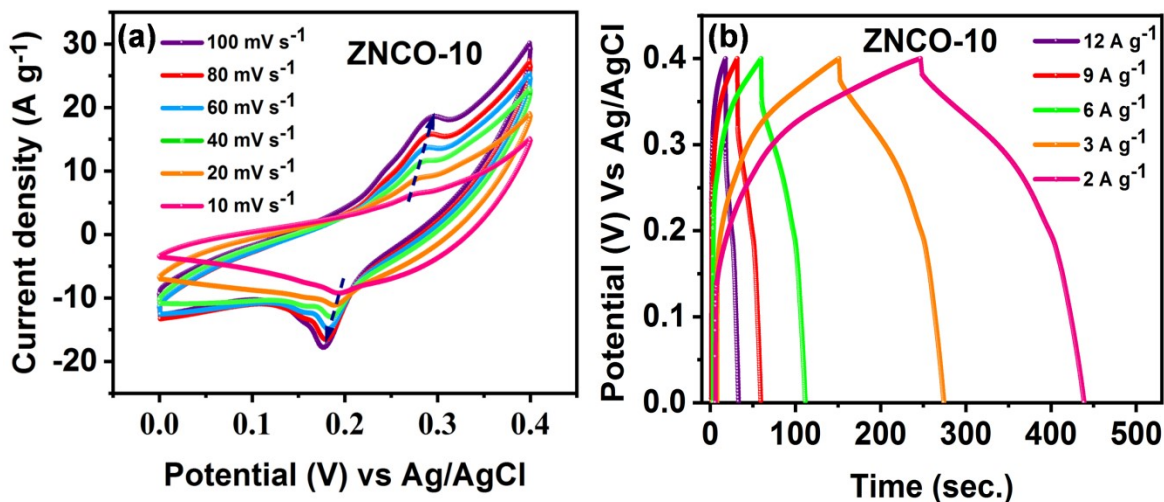

**Fig. S4:** (a) CV of ZNCO-10 at different scan rates; (b) GCD of ZNCO-10 at different current densities.
